# Supplementary material for: Multi-functionalized carbon nanotubes towards green fabrication of heterogeneous catalyst platforms with enhanced catalytic properties under NIR light irradiation
Source: Royal Society of Chemistry journal article supplement (doi:10.1039/d3nr02607h), 2023-01-01
Supplement: d3nr02607h1.pdf [file d3nr02607h1.pdf]

Supporting Information

**Multi-functionalized carbon nanotubes towards green fabrication of heterogeneous catalyst platforms with enhanced catalytic properties under NIR light irradiation**

*Xuefeng Pan<sup>a,d†</sup>, Rongying Liu<sup>b†</sup>, Zhilong Yu<sup>a</sup>, Benedikt Haas<sup>c</sup>, Zdravko Kochovski<sup>a</sup>, Sijia Cao<sup>a,d</sup>, Radwan M. Sarhan<sup>a</sup>, Guosong Chen<sup>b\*</sup>, and Yan Lu<sup>a,d\*</sup>*

*<sup>a</sup> Department for Electrochemical Energy Storage, Helmholtz-Zentrum Berlin für Materialien und Energie, Hahn-Meitner-Platz 1, 14109 Berlin, Germany*

*<sup>b</sup> The State Key Laboratory of Molecular Engineering of Polymers and Department of Macromolecular Science, Fudan University, Shanghai 200433, China*

*<sup>c</sup> Department of Physics & IRIS Adlershof, Humboldt-Universität zu Berlin, Newtonstr. 15, 12489 Berlin, Germany*

*<sup>d</sup> Institute of Chemistry, University of Potsdam, Karl-Liebknecht-Str. 24-25, 14476 Potsdam, Germany*

† These two authors contribute equally to this manuscript.

\* Corresponding authors:

*Guosong Chen: guosong@fudan.edu.cn*

*Yan Lu: yan.lu@helmholtz-berlin.de*

## Supplementary data

### Supplementary Figures

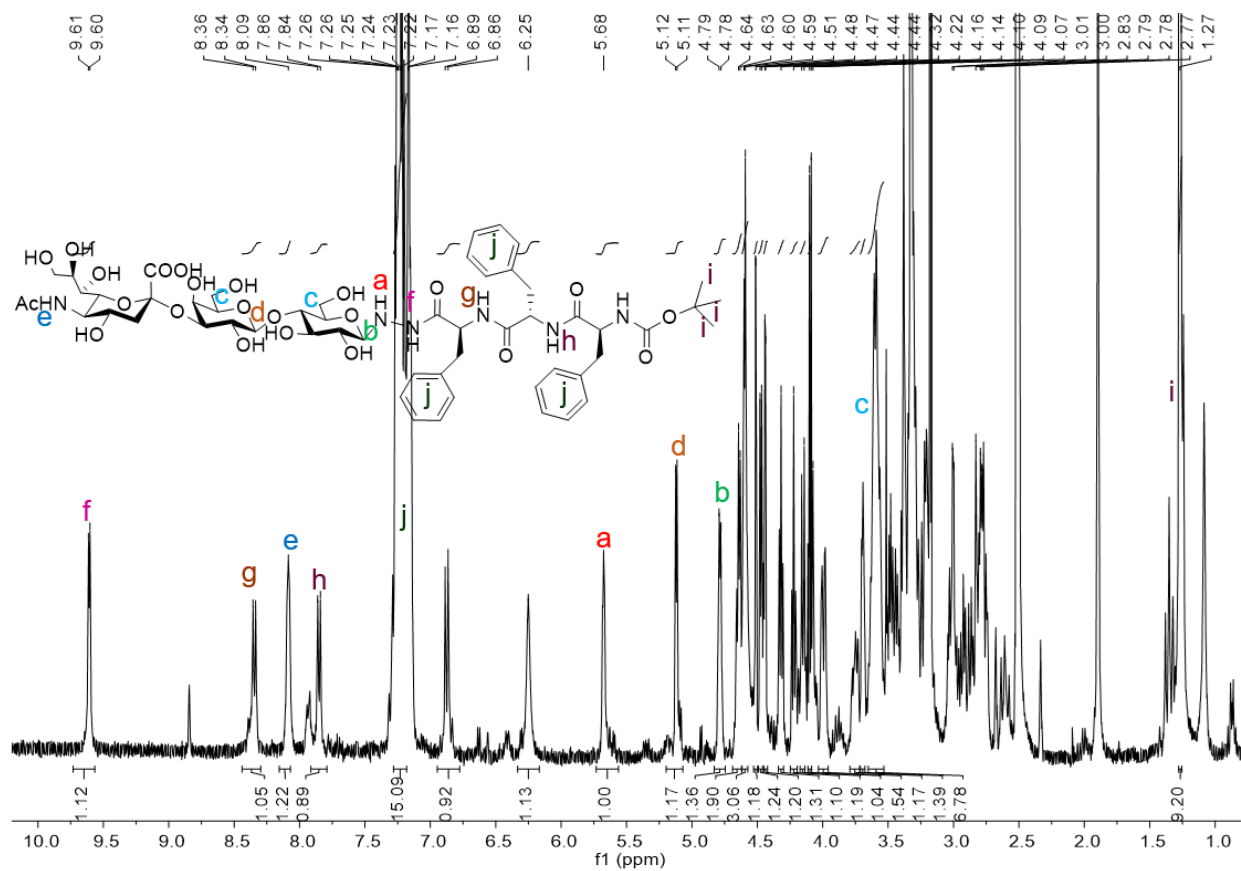

Fig. S1. <sup>1</sup>H-NMR spectrum of the GP powder dissolved in DMSO-*d*<sub>6</sub>.

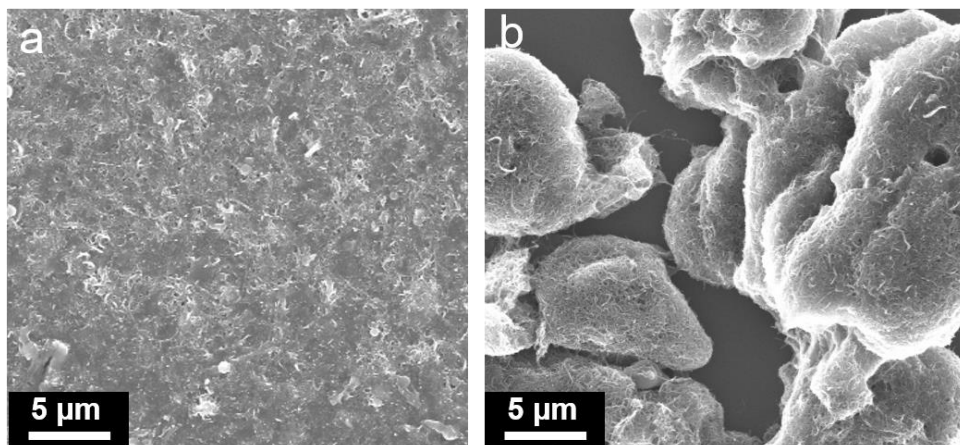

Fig. S2. SEM images of (a) the GP-CNTs dispersion and (b) the pristine CNTs cluster with a scale bar of 5 μm.

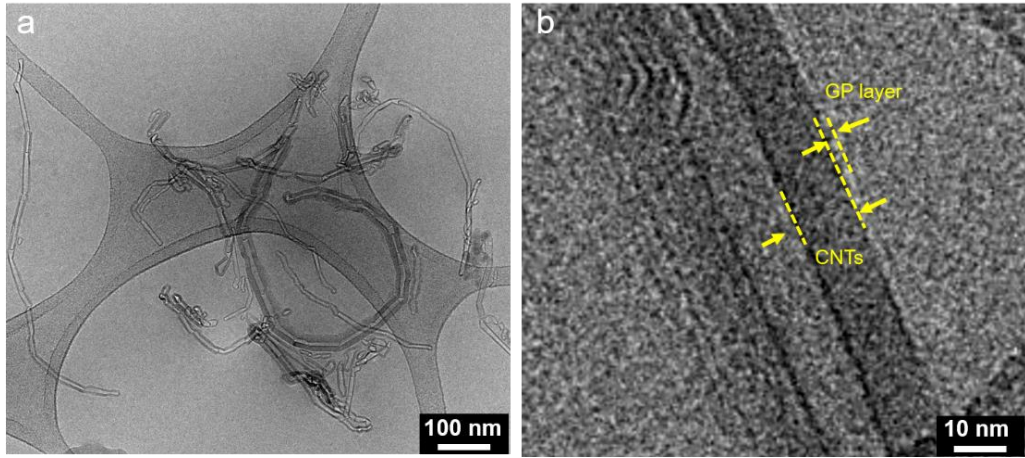

**Fig. S3.** Cryo-TEM images of the GP-CNTs dispersion at different magnifications.

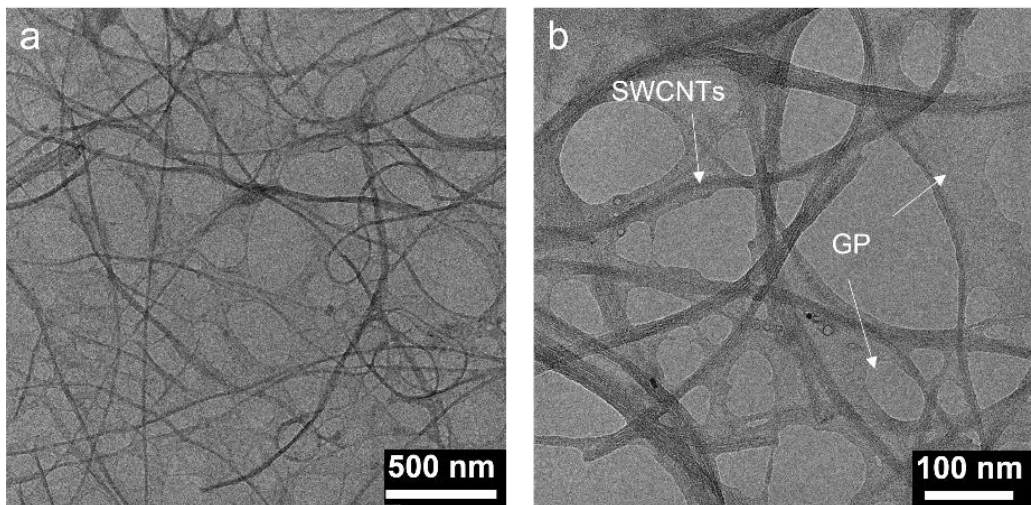

**Fig. S4.** TEM images of the SWCNTs dispersed with GP (same mass ratio of 1:1) at different magnifications.

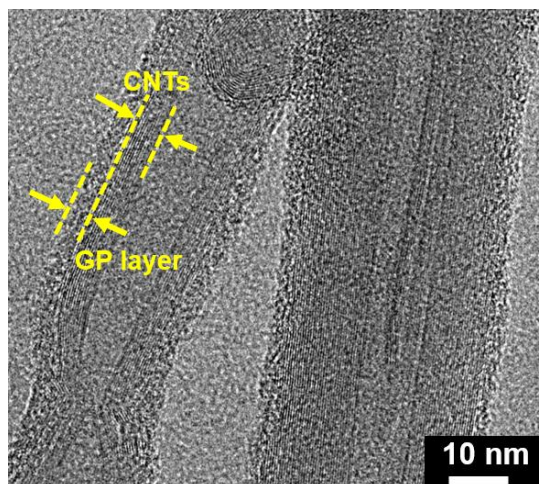

**Fig. S5.** HRTEM image of the GP-CNTs dispersion after storage for 2 months.

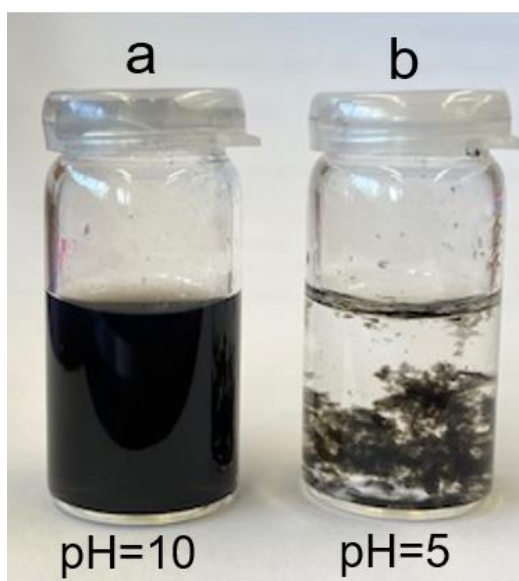

**Fig. S6.** Photos of the GP-CNTs dispersions at 0.2 mg/mL and the pH of (a) 10 and (b) 5 overnight.

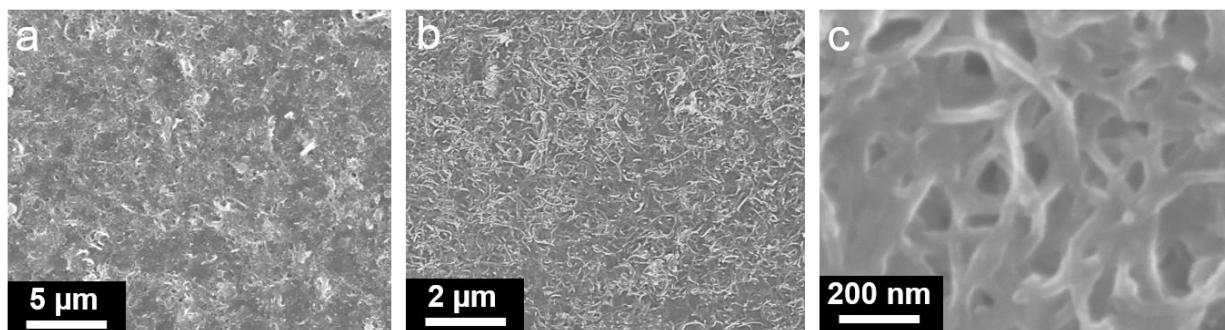

Fig. S7. SEM images of the GP-CNTs film after drying at various magnifications.

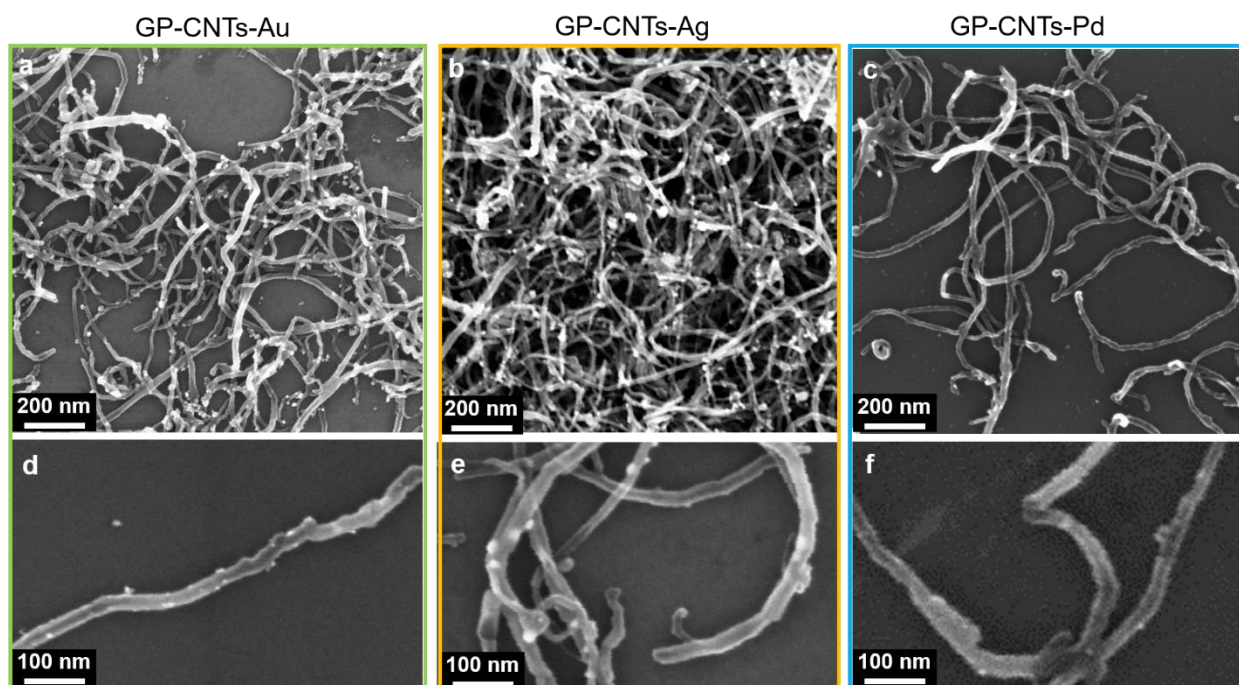

Fig. S8. SEM images of (a) GP-CNTs-Au, (b) GP-CNTs- Ag, and (c) GP-CNTs-Pd.

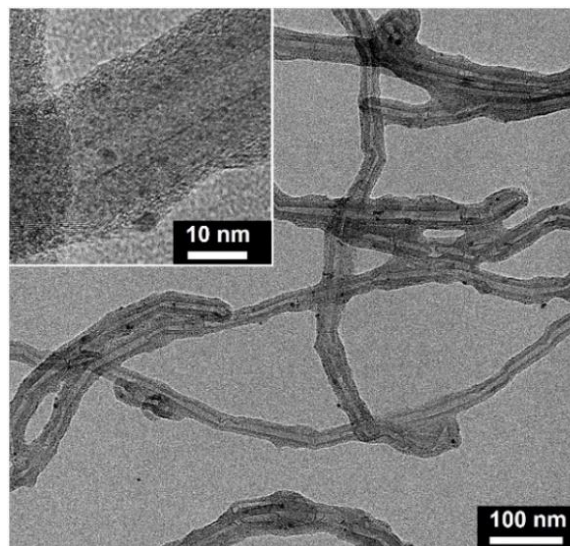

**Fig. S9.** TEM images of the GP-CNTs-Pd sample after storage for 1 month.

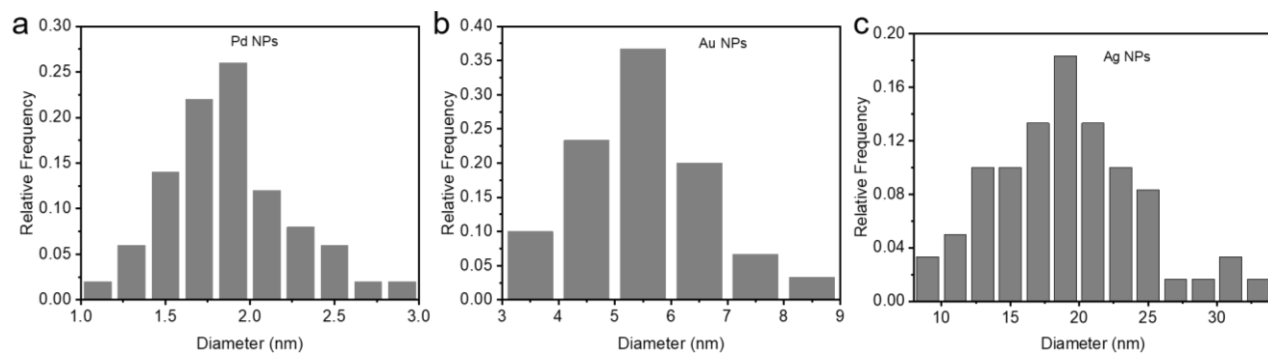

**Fig. S10.** Histograms of particle size distribution (based on over 50 particles) of (a) Pd NPs in GP-CNTs-Pd, (b) Au NPs in GP-CNTs-Au, and (c) Ag NPs in GP-CNTs-Ag determined from TEM analysis based on more than 50 particles.

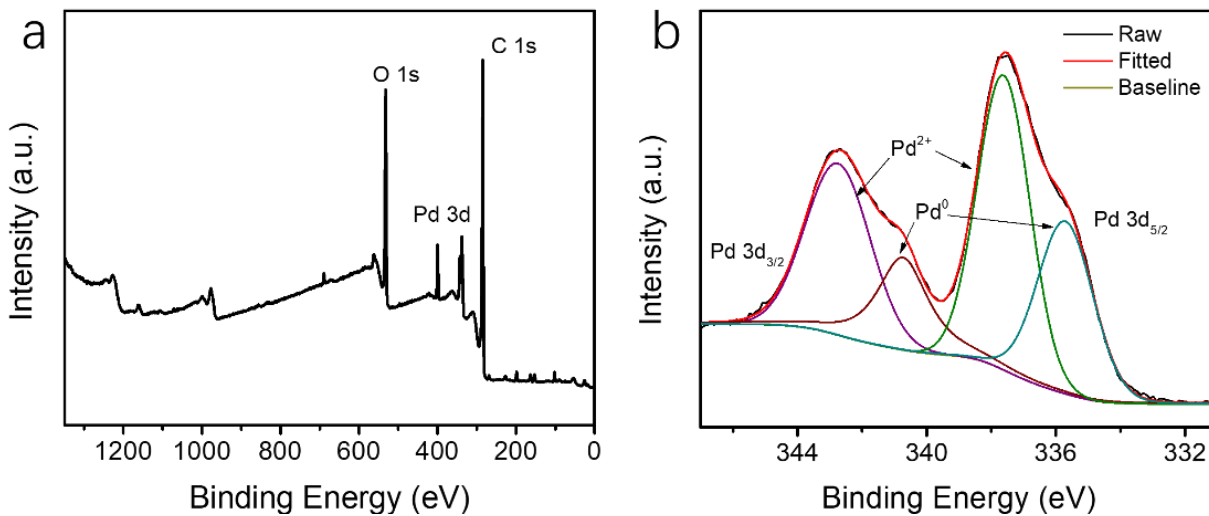

**Fig. S11.** (a) Full XPS spectrum and (b) high-resolution Pd 3d spectrum of the GP-CNTs-Pd composite.

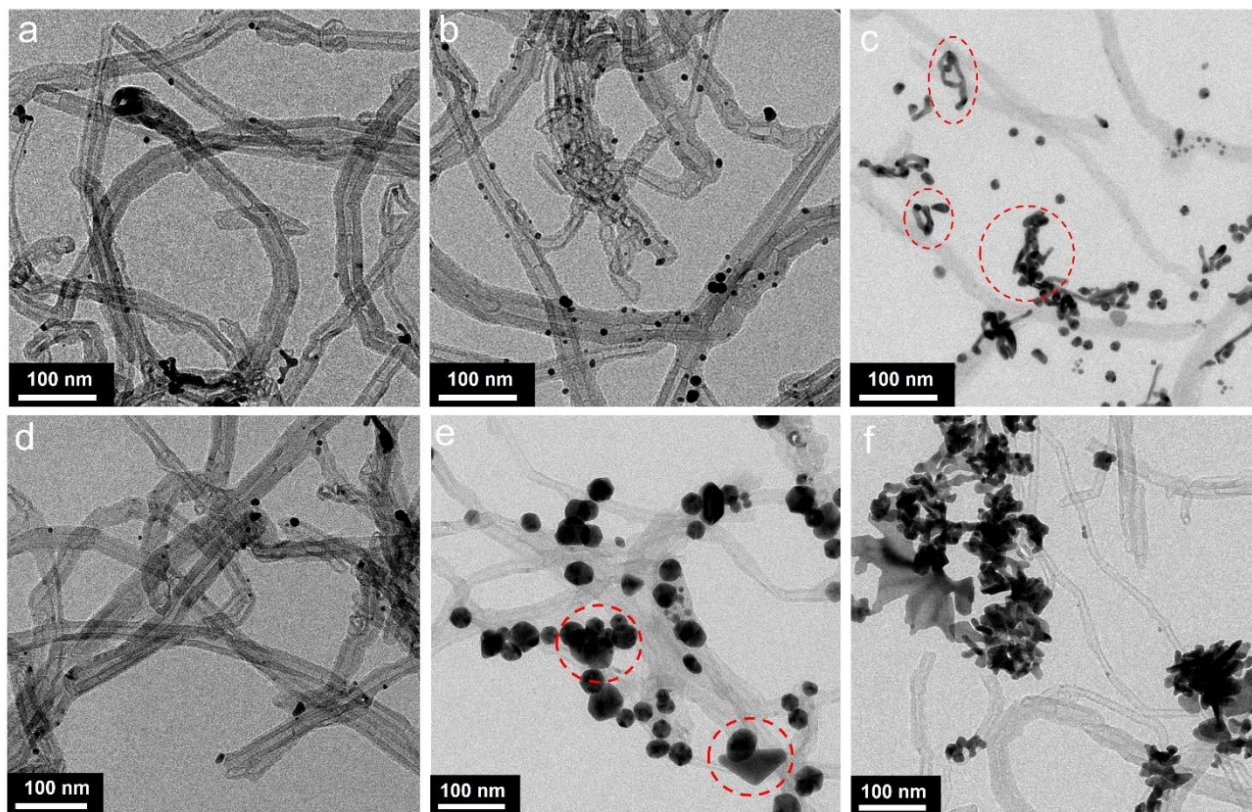

**Fig. S12.** TEM images of GP-CNTs-Au prepared at (a) 0.02 mg/mL of GP, 0.15 mM of HAuCl<sub>4</sub>; (b) 0.05 mg/mL of GP, 0.15 mM of HAuCl<sub>4</sub>; (c) 0.1 mg/mL of GP, 0.15 mM of HAuCl<sub>4</sub>; (d) 0.05 mg/mL of GP, 0.05 mM of HAuCl<sub>4</sub>; (e) 0.05 mg/mL of GP, 0.3 mM of HAuCl<sub>4</sub>; and (f) 0.05 mg/mL of GP, 0.15 mM of HAuCl<sub>4</sub> heated at 40 °C. Note that all the samples in (a-e) were prepared at room temperature.

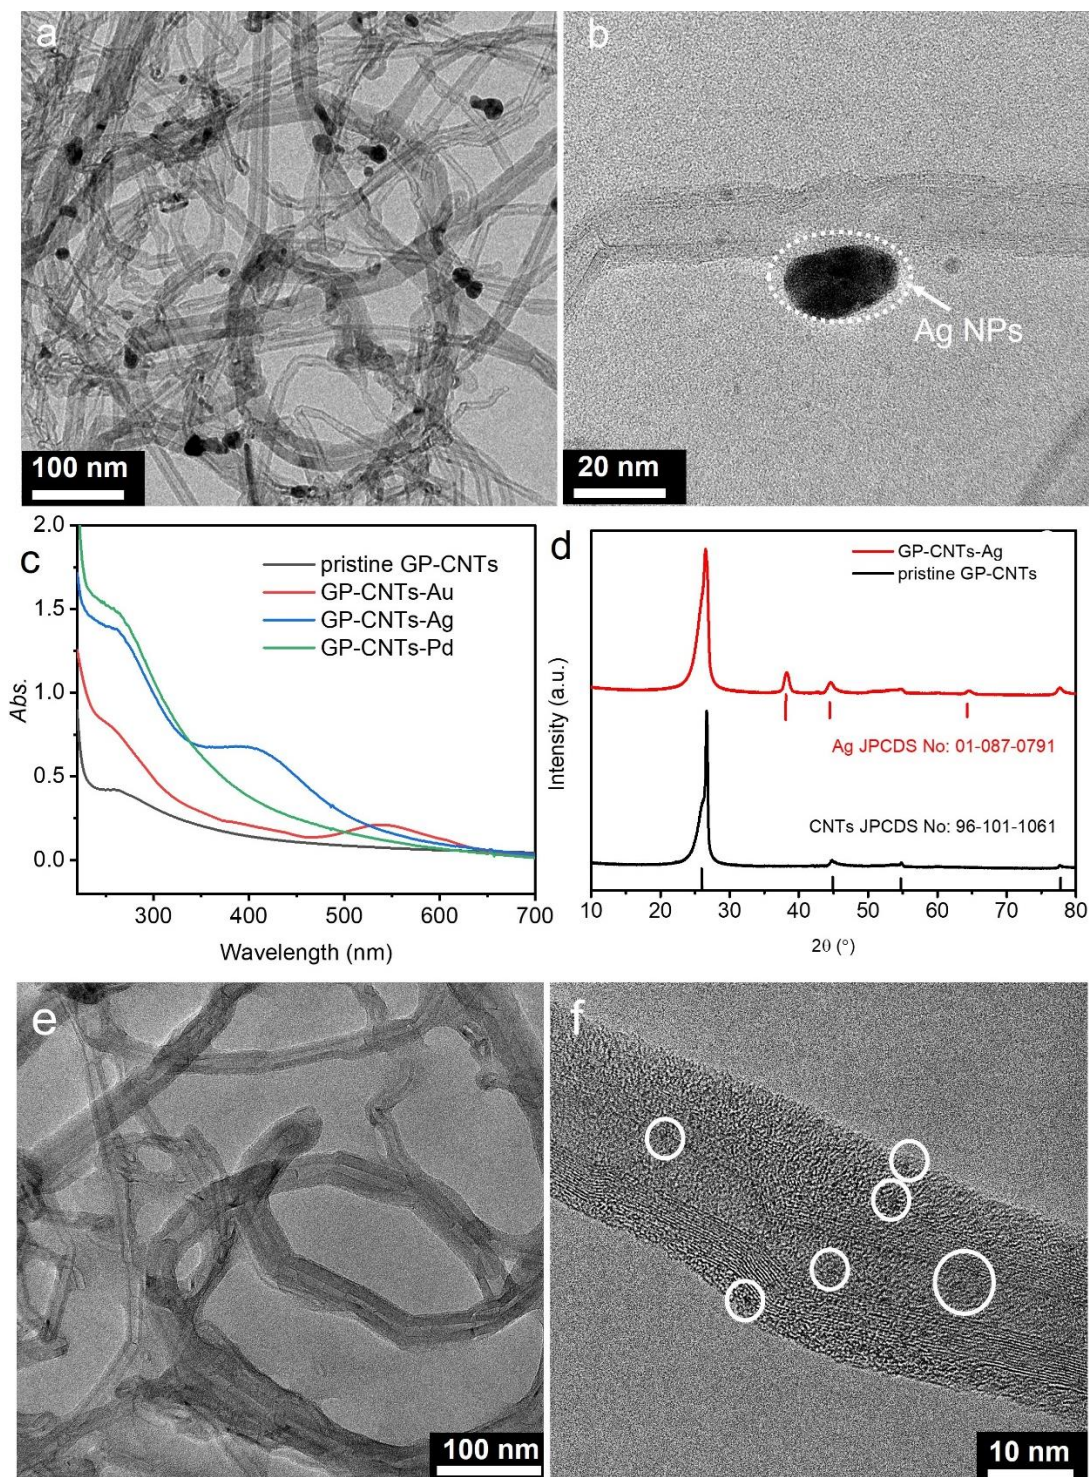

**Fig. S13.** (a, b) TEM images of GP-CNTs-Ag at different magnifications. (c) UV-Vis absorption spectra of various metal/CNTs composites. (d) XRD patterns of the pristine GP-CNTs and GP-CNTs-Ag powder after freeze-drying. The peaks at 38.2, 44.3, and 64.7° in XRD indicate the (111), (200), and (220) planes of the (*fcc*) metallic Ag (JPCDS NO. 01-087-0719).<sup>1</sup> (e-f) TEM images of the GP-CNTs-Pt prepared by mixing GP-CNTs (0.05 mg/mL) with H<sub>2</sub>PtCl<sub>6</sub> (0.15 mM) at room temperature with stirring for 24 h.



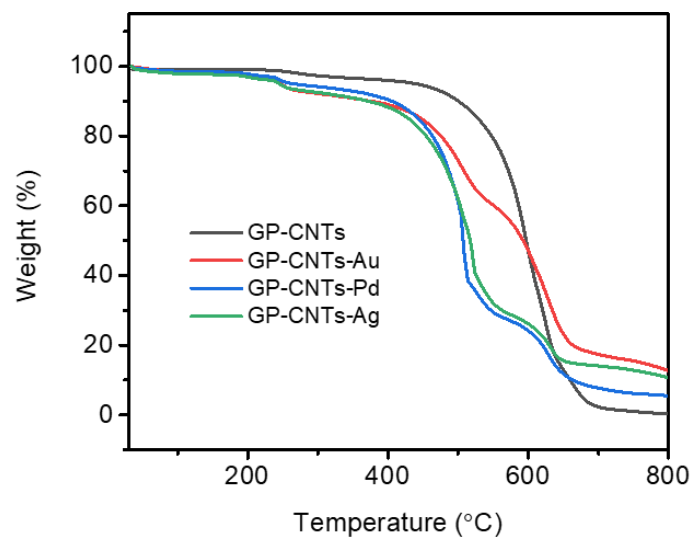

**Fig. S14.** TGA curves of the GP-CNTs-Au, GP-CNTs-Ag, and GP-CNTs-Pd powder in synthetic air.

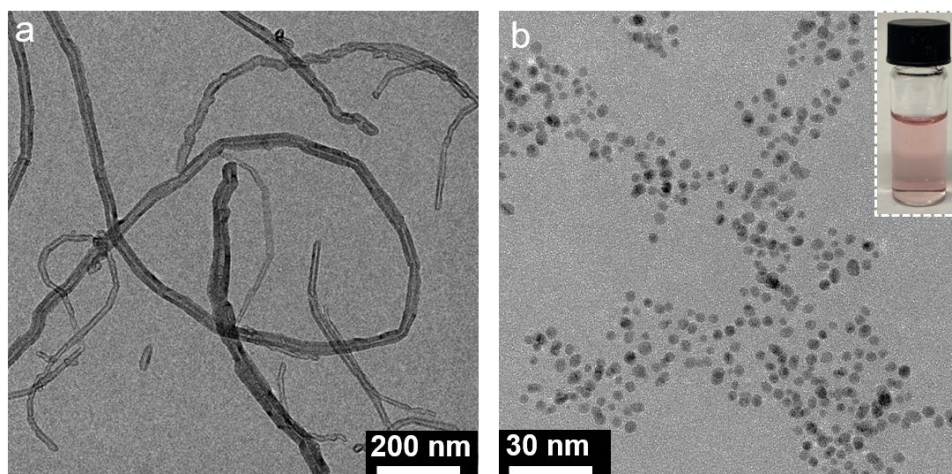

**Fig. S15.** TEM images of (a) Pristine CNTs cluster mixed with  $\text{HAuCl}_4$  in the absence of GP molecules. (b) Au NPs generated in the mixture of  $\text{HAuCl}_4$  (0.01 mM) and GP (0.1 mg/mL) solution. The inset in (b) is the corresponding photo of the obtained Au NPs dispersion.

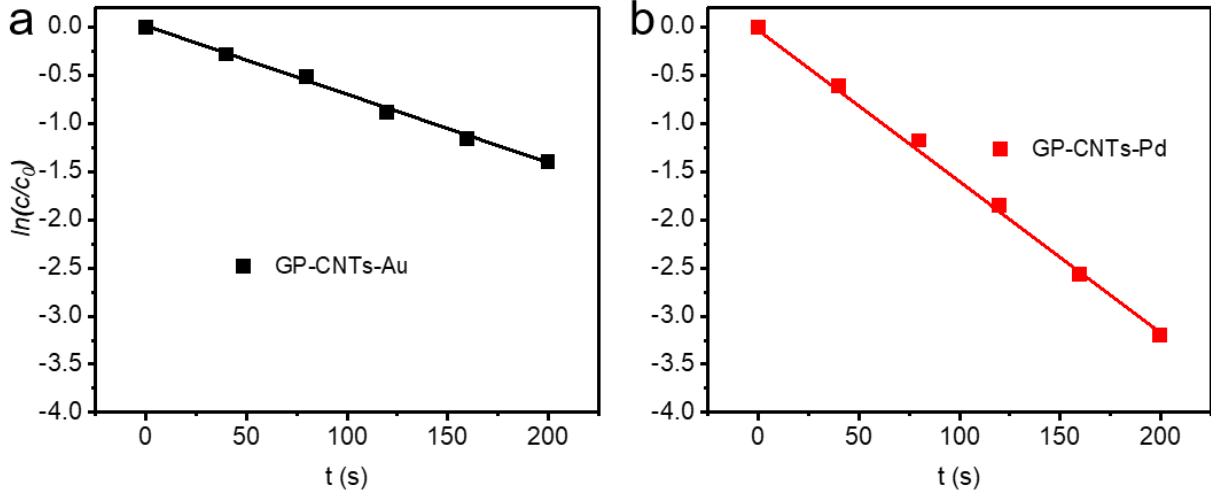

**Fig. S16.** Reduction of 4-NP with (a) GP-CNTs-Au at 10.5  $\mu\text{g/mL}$  and (b) GP-CNTs-Pd at 1.80  $\mu\text{g/mL}$ . The concentration of 4-NP and  $\text{NaBH}_4$  was 0.005 mM and 0.1 M, respectively.

When adding an excess amount of  $\text{NaBH}_4$ , the reduction kinetics of 4-NP mainly follow a pseudo-first-order law. Apparent rate constant ( $k_{app}$ ) of 4-NP can be given by:

$$\ln \frac{c}{c_0} = \ln \frac{I}{I_0} = -k_{app}t = -k_1 S_t t \quad (1)$$

where  $c$  and  $c_0$  are the concentration and  $I$  and  $I_0$  are the absorption intensity at 400 nm of 4-NP at the given time  $t$  and the very beginning of the reaction, respectively.<sup>2</sup>  $S_t$  is the total surface of catalytic particle and  $k_1$  is the rate constant normalized to  $S_t$ .  $k_{app}$  can be obtained from the linear correlation between  $\ln(I/I_0)$  or  $\ln(c/c_0)$  and  $t$ . As a result, GP-CNTs-Pd displayed a fast catalytic conversion of 4-NP, giving a  $k_{app}$  value of  $0.016 \text{ s}^{-1}$ , while a  $k_{app}$  value of  $0.0021 \text{ s}^{-1}$  has been measured for GP-CNTs-Au (Fig. S16).

Note that the reduction mainly proceeds on the surface of the metal NPs. If we assume both Pd and Au particles are ideally spherical,  $S_t$  can be thus calculated by:

$$m_0 = \frac{1}{6} \rho \pi d^3 \quad (2)$$

$$S_0 = \pi d^2 \quad (3)$$

$$n = \frac{m}{m_0} \quad (4)$$

$$S_t = \frac{n S_0}{V} \quad (5)$$

where  $m_0$ ,  $S_0$ , and  $n$  are the mass and surface of a single catalyst particle and the total number of metal particles, respectively;  $m$  is the total mass of metal catalyst that can be estimated from TGA measurement (13.2 wt.% for GP-CNTs-Pd and 11.5 wt.% for GP-CNTs-Au);  $\rho$  is the density of the catalytic particle, assuming it is the same as the density of their bulk material (12.0 g/cm<sup>3</sup> for Pd and 19.3 g/cm<sup>3</sup> for Au);  $d$  is the diameter of the particle, which can be obtained from the HRTEM analysis (1.8 nm for Pd and 5.6 nm for Au).<sup>3</sup>  $V$  is the reaction volume (2.5 mL here). According to Table S2, the  $S_t$  was thereby fixed to be 0.26 m<sup>2</sup>/L. The value of GP-CNTs-Pd was calculated to be 0.062 s<sup>-1</sup> m<sup>-2</sup> L, which is higher than that of GP-CNTs-Au (0.0081 s<sup>-1</sup> m<sup>-2</sup> L), demonstrating the superior catalytic activity of GP-CNTs-Pd.

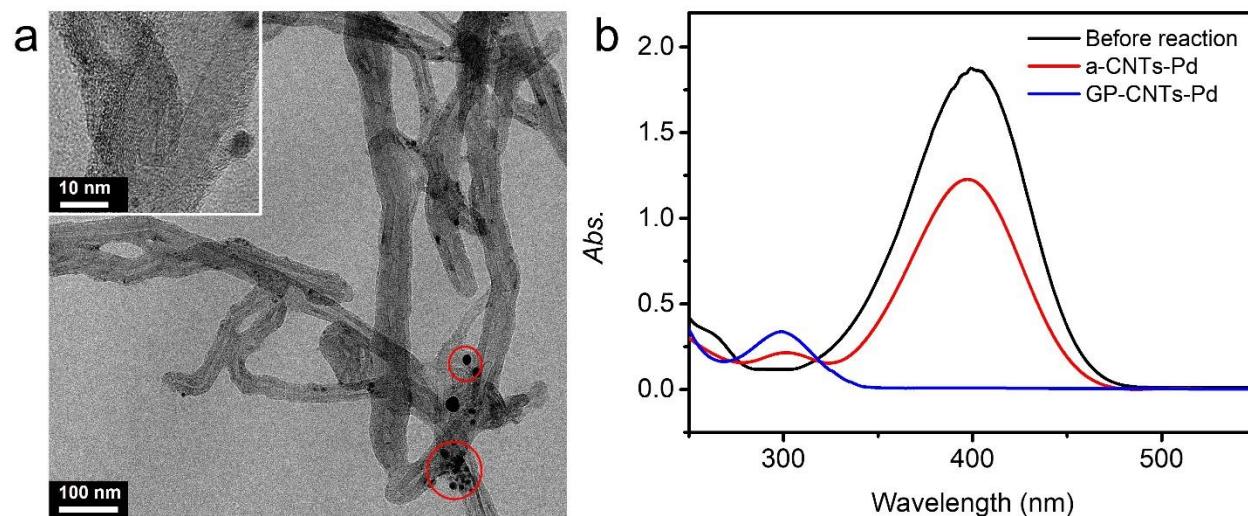

**Fig. S17.** (a) TEM images of a-CNTs-Pd. (b) Reaction comparison: both a-CNTs-Pd and GP-CNTs-Pd at the concentration of 0.02 mg/mL, 4-NP at 0.1 mM, and NaBH<sub>4</sub> at 20 mM at room temperature.

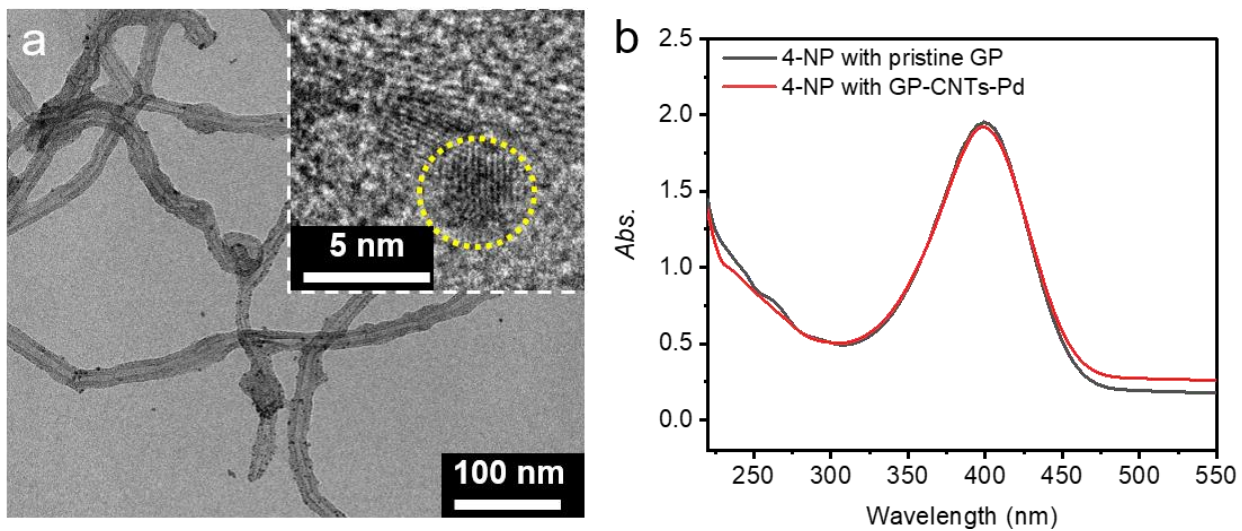

**Fig. S18.** (a) TEM image of the GP-CNTs-Pd dispersion after catalytic cycles. (b) Reduction reaction of 4-NP with either GP-CNTs-Pd or pristine GP molecules at pH of  $\sim 10$  without  $\text{NaBH}_4$  after 15 min.

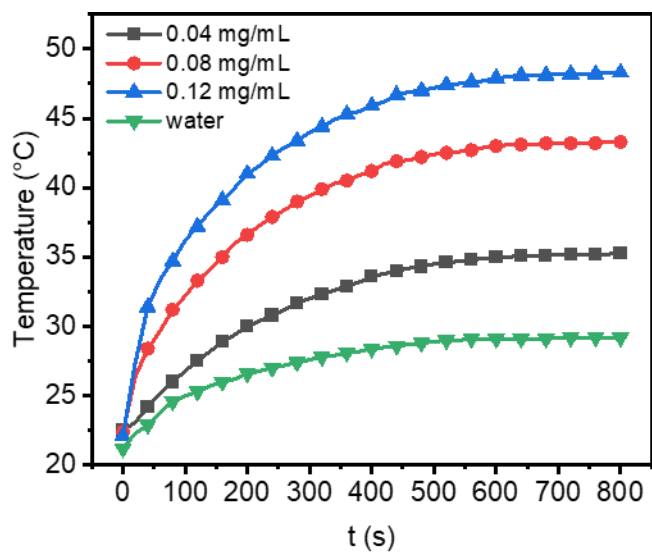

**Fig. S19.** Temperature variation of the GP-CNTs-Pd dispersion at various concentrations.

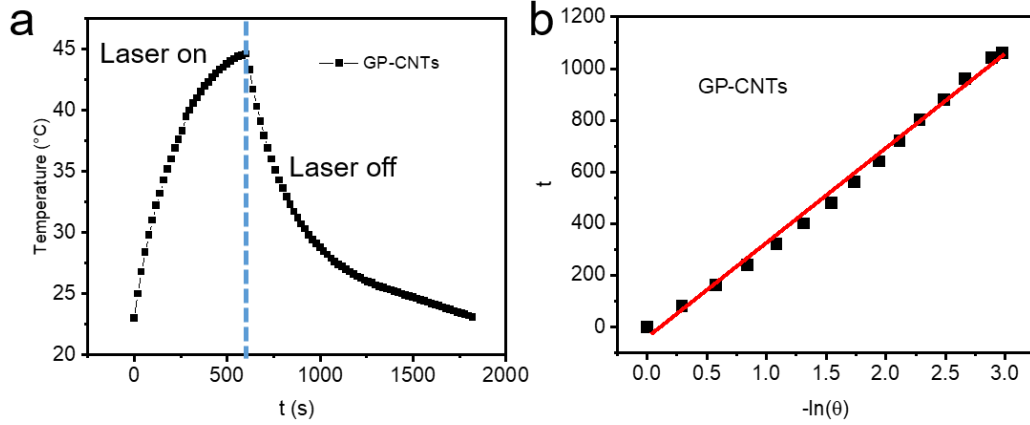

**Fig. S20.** (a) Temperature variation of the GP-CNTs dispersion under NIR irradiation. (b)  $t$  versus  $-\ln(\theta)$  obtained from the cooling curve.

The photothermal conversion efficiency ( $\eta$ ) can be calculated based on the heating-cooling profiles and given by:

$$\eta = \frac{hs(T_{max}-T_{sur})-Q_{Dis}}{I(1-10^{A_{808}})} \quad (2)$$

where  $h$ ,  $s$ ,  $Q_{Dis}$ , are the heat transfer coefficient, surface area of the container, heat dissipated from the light absorbed by the quartz sample cell containing with pure water, respectively.  $I$  and  $A_{808}$  are the laser intensity and absorption of dispersion at the wavelength of 808 nm, respectively. where  $T_{sur}$ ,  $T_{max}$  are surrounding temperature and maximum temperature of the GP-CNTs dispersion, respectively.<sup>4,5</sup>

To calculate  $hs$ , a dimensionless parameter ( $\theta$ ) needs to be introduced and determined by:

$$hs = \frac{m_D C_D}{\tau_s} \quad (3)$$

where  $m_D$  and  $C_D$  are the mass of water (1 g) and heat capacity (4.2 J/g·°C), respectively. The time constant ( $\tau_s$ ) can be determined from the slop of cooling curve (**Fig. S16b**) according to the equations below:

$$t = -\tau_s \ln(\theta) \quad (4)$$

$$\theta = \frac{T-T_{sur}}{T_{max}-T_{sur}} \quad (5)$$

where  $t$  and  $T$  are the time and cooling temperature of the dispersion during cooling stage. Hence,  $\tau_s$  of the pristine CNTs cluster and GP-CNTs dispersion were determined to be 328.1 and 370.4 s, respectively. Correspondingly, the value  $\eta$  of CNTs cluster and the GP-CNTs dispersion were determined to be 4.2 % and 22.3 %, respectively.

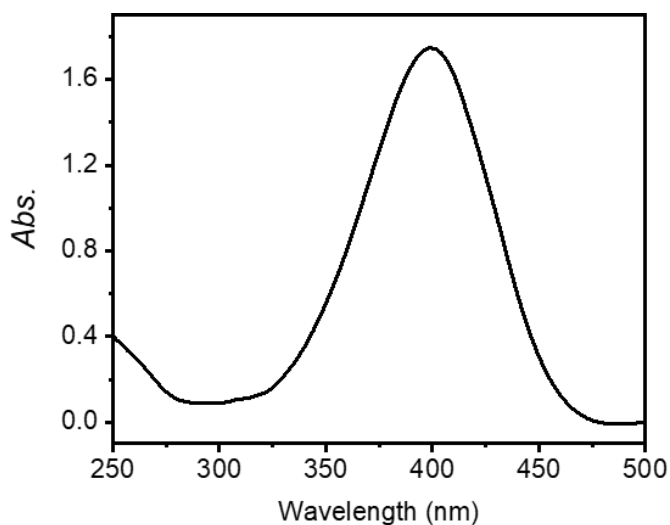

**Fig. S21.** Reduction reaction of 4-NP after NIR light irradiation for 15 min before introducing  $\text{NaBH}_4$ .

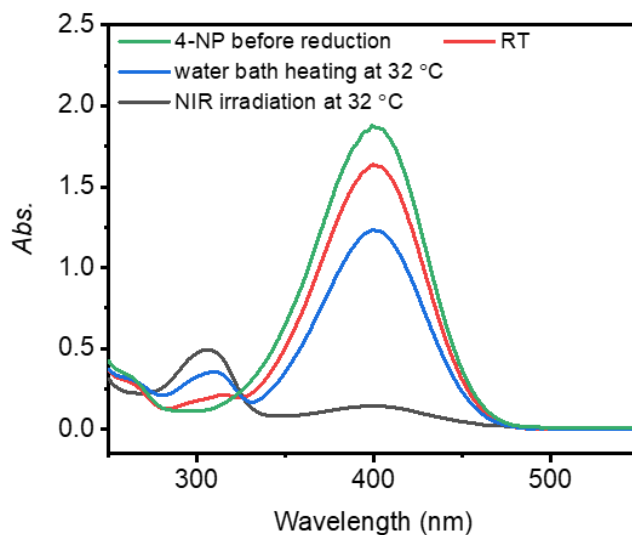

**Fig. S22.** Reduction reaction of 4-NP under various heating conditions after 5 min.

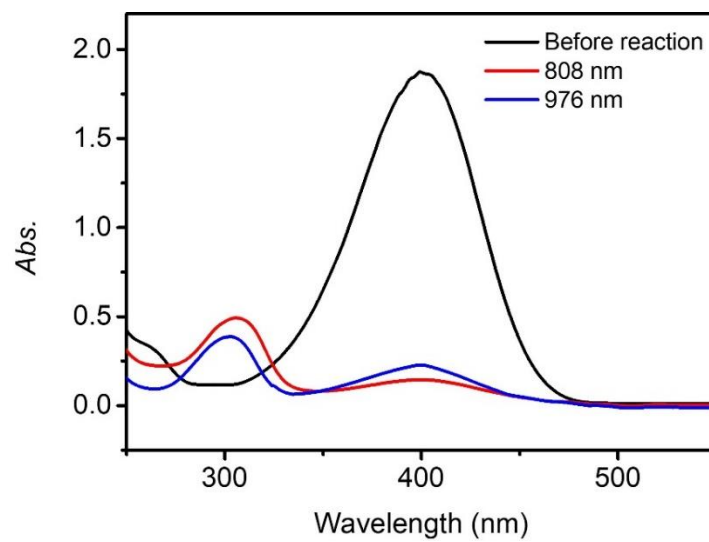

**Fig. S23.** Reaction comparison of GP-CNTs-Pd under NIR light illumination at 808 and 976 nm ( $3 \text{ W/cm}^2$ ) for 5 min with the concentration of GP-CNTs-Pd at 0.03 mg/mL, 4-NP at 1 mM, and  $\text{NaBH}_4$  at 0.2 M.

## Supplementary Tables

**Table S1.** Comparison of the catalytic activity of the Pd-based catalysts.

| Sample       | Size (nm) | $C_{cat}$            | $C_{NaBH_4}$ (mM) | $C_{4-NP}$ (mM) | $t$ (min) | $T$ (°C) | $k_m \times 10^{-3} \text{ s}^{-1} \text{ mg}^{-1}$ | Ref.      |
|--------------|-----------|----------------------|-------------------|-----------------|-----------|----------|-----------------------------------------------------|-----------|
| Pd-peptide   | 2.6       | 79 $\mu\text{M}$     | 10                | 0.05            | 10        | 25       | 8.73                                                | 6         |
| Pd           | 26.5      | 5 $\mu\text{g/mL}$   | 100               | 2               | 20        | 25       | 24                                                  | 7         |
| Pd-Au/PS-PVP | 3.1       | 3.6 $\mu\text{g/mL}$ | 20                | 0.1             | 10        | 25       | 95.6                                                | 8         |
| Pd/protein   | 2.8       | 0.6 $\text{mg/mL}$   | 10.5              | 0.1             | 10        | 20       | 3.33                                                | 9         |
| Pt-Pd alloy  | ~57       | 5 $\mu\text{g/mL}$   | 100               | 0.1             | 10        | 22       | 226.7                                               | 10        |
| Pd-PAMAM     | 1.8       | 0.01 mM              | 10                | 0.2             | 15        | 15       | 113.3                                               | 11        |
| GP-CNTs-Pd   | 1.8       | 50 $\mu\text{g/mL}$  | 20                | 0.1             | 10        | 25       | 146.5                                               | This work |

Note that  $C_{cat}$ ,  $C_{NaBH_4}$ ,  $C_{4-NP}$ ,  $t$ ,  $T$ , and  $k_m$  are the catalyst concentration,  $\text{NaBH}_4$  concentration, 4-NP concentration, reaction time, reaction temperature, and  $k_{app}$  normalized with the catalyst mass, respectively.

**Table S2.** Summary for the calculation of  $S_t$ .

| Metal | $m$ ( $\mu\text{g}$ ) | $\rho$ ( $\text{g/cm}^3$ ) | $d$ (nm) | $m_0$ (g)              | $n$                   | $S_0$ ( $\text{m}^2$ ) | $S_t$ ( $\text{m}^2/\text{L}$ ) |
|-------|-----------------------|----------------------------|----------|------------------------|-----------------------|------------------------|---------------------------------|
| Pd    | 0.59                  | 12.0                       | 1.8      | $3.66 \times 10^{-20}$ | $1.61 \times 10^{13}$ | $4.07 \times 10^{-17}$ | 0.26                            |
| Au    | 3.02                  | 19.3                       | 5.6      | $1.77 \times 10^{-18}$ | $1.70 \times 10^{12}$ | $3.93 \times 10^{-16}$ | 0.26                            |



## References in SI:

1. S.-H. Min, G.-Y. Lee and S.-H. Ahn, *Composites Part B: Engineering*, 2019, **161**, 395-401.
2. S. Wunder, F. Polzer, Y. Lu, Y. Mei and M. Ballauff, *J. Phys. Chem. C*, 2010, **114**, 8814-8820.
3. P. Hervés, M. Pérez-Lorenzo, L. M. Liz-Marzán, J. Dzubiella, Y. Lu and M. Ballauff, *Chem. Soc. Rev.*, 2012, **41**, 5577-5587.
4. X. Liu, B. Li, F. Fu, K. Xu, R. Zou, Q. Wang, B. Zhang, Z. Chen and J. Hu, *Dalton Trans.*, 2014, **43**, 11709-11715.
5. G. M. Neelgund and A. Oki, *Ind. Eng. Chem. Res.*, 2018, **57**, 7826-7833.
6. R. Bhandari and M. R. Knecht, *ACS Catalysis*, 2011, **1**, 89-98.
7. N. K. Reddy Bogireddy, K. K. H. Anand and B. K. Mandal, *Biointerface Res. Appl. Chem.*, 2018, **8**, 3319-3323.
8. S. Mei, J. Cao and Y. Lu, *J. Mater. Chem. A*, 2015, **3**, 3382-3389.
9. S. Behrens, A. Heyman, R. Maul, S. Essig, S. Steigerwald, A. Quintilla, W. Wenzel, J. Bürck, O. Dgany and O. Shoseyov, *Adv. Mater.*, 2009, **21**, 3515-3519.
10. Y. Wang, Q. Li, P. Zhang, D. O'Connor, R. S. Varma, M. Yu and D. Hou, *J. Colloid Interface Sci.*, 2019, **539**, 161-167.
11. K. Esumi, R. Isono and T. Yoshimura, *Langmuir*, 2004, **20**, 237-243.
